# Supplementary material for: Depletion of Trypanosome CTR9 Leads to Gene Expression Defects
Source: PubMed Central journal article supplement (PMC3332058; doi:10.1371/journal.pone.0034256), 2012-04-20
Supplement: pone.0034256.s001.pdf [file pone.0034256.s001.pdf]

**Supplementary Figure S1**

**Alignment of Ctr9 homologues**, made using MegAlign (DNASTar). Residues that are identical to the majority consensus are highlighted in black, and residues that are within the consensus group (consensus #1) in grey. Groups are f-hydrophobic; p-polar, a-acidic, b-basic. Organisms are: Tb- *T. brucei*, At- *Arabidopsis thaliana*, NP\_178674.6; Dd- *Dictyostelium discoideum* XP\_642310; Eh- *Entamoeba histolytica* EAL45089; Hs- *Homo sapiens* NP\_055448; Ng- *Naegleria gruberi* XP\_002679971; Sc- *Saccharomyces cerevisiae* Ctr9; Sp- *Schizosaccharomyces pombe* CAA15833.



```
f p . f . p f f p b . f f f f p b p - - - - . f a p f . . p f . f f f . f . b Consensus #1
P X E P S N X L G X G V L L L X K G - - - - S L D X A X S X F X F V L D X X K Majority
                170                180                190                200
78  R P V L Y L E G V A T S G - - - - T S L Q A S M K F E E L R D K TbCtr9
125 H E P S G G Q L L L A K G - - - - E D A L Q A F K V L D T A P AtCtr9
131 P H Q P L G A V L L L K G - - - - D Y R A E S F K Q V L D A K DdCtr9
119 D E A E C G F N Y K K - - - - P C K D F K R L E N K EhCtr9
125 D Q N H L G A C L L E G D - - - - K D A D A F H F V L N Q S P HsCtr9
147 P K S N Y G V L H L L G - - - - A L D K A E S F D Y T D K NgCtr9
134 P W G N L A T V E L Y Y G - - - - H Y D K A L E S D K S I ScCtr9
133 S K S E I N L L G Y R L L P T D K E S L A A R F D F V L Q K S G SpTpr1
```

```
p p - - - - - f f f f p . f p f . f p b b p p b . f f p . p . b f Consensus #1
X N - - - - - I X A L L G X A C I L F N K X N Y X E A L S X Y Q X A Majority
                210                220                230                240
114 H F - - - - - I A R G L A A C F M D Y R S S H Y R A TbCtr9
160 D N - - - - - A L L G Q A E F N G R F S E S L L Y K A AtCtr9
166 N N T - - - - L P V A K L G S A C I L F N Q G N Y I K A L D T Y Q DdCtr9
151 - - - - - A L L G L A L C E K D K D G V A L S Y F I Q A EhCtr9
161 N - - - - - I A L L G K A C I S F N D Y G A L A Y Y K A HsCtr9
182 D N - - - - - I S K L G M A C I K Y H K Y E A L S E F E Q C NgCtr9
169 A E D H R S G R Q S K P N C L L R A K L Y K E N Y M A S L K I F Q E ScCtr9
173 N - - - - - I G L G K A R I L Y A K G N Y S A L K L Y Q A SpTpr1
```

```
f . p p - f p p f f a f b f p f p f p f . . f p . f a b f . . f f a b f f p f a Consensus #1
L X T N - P X C P X D V R L G I G L C F Y K L G R L K K A X X A F E R X L Q L D Majority
                250                260                270                280
143 L E T V G S A P G I V R G G L C Y R L G R A A V K E R L A N TbCtr9
189 L Q V F - P C P A V R L G I G L C R Y K L G Q L K A R Q A F R L Q L D AtCtr9
200 Q N - S C S V R L G G Y C Y F K L G R T K K A K E A F K R L E L D DdCtr9
180 L K K - P T - S R C G I G R I Y Y S O K E K L A I R C Y E S L V L D EhCtr9
190 L R T N - P C P V R L G G H C F V K L K L K A R L A F S R L E L N HsCtr9
211 L L M N - P P D R L G G L C H Y Q L D N L K A K Q C F E R L Q L D NgCtr9
209 L V I N - P V L Q D R G I G L C F W Q L K D S K M A I K S Q R L Q L N ScCtr9
202 L V N - P F K D R G I G L C F W N L D M K T D A L S A T R Q Q L D SpTpr1
```

```
f . p - - f a f f f p f . f f a f p f . . - - - - - p f b b f f . - f f Consensus #1
P K N - - V X A L I G L A X X D L N F R X X - - - - - X X I K K A L X - L L Majority
                290                300                310                320
183 G E D - - V A A L L L Y L A Q R - - - - - R I K E D - TbCtr9
228 P D N - - V A A L A L G D L N D S - - - - - I K G D - R AtCtr9
239 R D N - - V A I G L A L N E N - - - - - I P E A K - L DdCtr9
218 N I - - A L I L S R Y D R T P - - - - - Q K A L E - L EhCtr9
229 S K - - V G A L G L A L N N K E A - - - - - D I K N G Q - L L HsCtr9
250 P N N - - V S A L I L A I D L N S R D E - - - - - E L Q N A K N Y L NgCtr9
248 P K N T S S L L L G E R E F T N S T N D K T F K E A T K A L S - D L ScCtr9
241 P K N T V V T Y I G L Y Y Y D L A F Q N V N - N D S F V Q Y G K A L Q - H SpTpr1
```



```
----- f f . p f b b f p . f . f . . . p f f f . Consensus #1  
----- A L E Y L K K A T X L D P D D S N A L I X Majority  
490 500 510 520  
351 - - - - - A L E S K L T E S V P G D V S T TbCtr9  
396 - - - - - A L E Y K A T K L D P R D A A G AtCtr9  
415 N N N I N I N N N N N L S N E I I N K K N V L K K A T E L N P N D S N E E DdCtr9  
384 - - - - - E Y L E K A V K D Y T I E L I V EhCtr9  
397 - - - - - A K G H L K K T E Q Y P D D V E A I E HsCtr9  
416 - - - - - S L A Y L K K L K K D P E N I N A L R NgCtr9  
428 - - - - - T S A K E Q S N L N E K A L K Y L E Y L K L T A T K N Q L I ScCtr9  
417 - - - - - M L L D R A N L G S S K L R V D S D Y I T SpTpr1
```

```
f p . f f a . p . f p . f f a f . p b f f . f f . . . f . f . f Consensus #1  
L X X L L E X X X X X A L X A Y K X A L - I L E X - - - - - X - X I X V P X Majority  
530 540 550 560  
372 L A A C S R L N S E E S K L T L H I Y E E L G - - - - - T P V P TbCtr9  
417 L E L L I S D T A A L A F K M A R - T L M K - - - - - K G G Q E V P AtCtr9  
455 L Q L E S E T A L A Y E G L - N L L K - - - - - K D G I V S DdCtr9  
404 S L L E E - K Q K K A L H Y N - - - - - E I N S T EhCtr9  
418 L A Q L E Q D G A L S A Y T A T R I L Q E - - - - - K V Q D V P HsCtr9  
437 E H E R - H Q L A L S L K E A L T I E E G - - - - - E T E V V T H NgCtr9  
461 S R A Y L V I Q E Q N Q Y K T S L D Y L S K A L E E M E F I K K E P ScCtr9  
443 Q A R L E K E D T K K S L G L A L D L E S - - - - - A H S V G SpTpr1
```

```
a f f p p f f f f . p . f p . f f a f . a p f f . f f p f f . - - - - - b . Consensus #1  
E X L N N I A V L H X X L G X L I E A X E X F X K A L S L A - - - - - X X Majority  
570 580 590 600  
405 K R A N K A S C D G T L Q N L E E G E D F L S - - - - - P TbCtr9  
450 E L N D I G L H F E R E E L E S A L E F K E A L D G I W I S F L D E E AtCtr9  
488 E Q N N I A V L R H Q K G L L E A E Q Y D K Q - - - - - S G Y Q L N Q DdCtr9  
430 E L N N G C C Y F E L I K S K E F E K A L D - - - - - EhCtr9  
452 E L N N G L H F R L G N L G E A K K F A S L D R A K A E A E H D E Y HsCtr9  
471 E Y N N I A V H Y K L G K N T E S E E F K K A L S L A E C N V M D N L D D NgCtr9  
501 E L N N A C Y H F I N G D I K A D L F K Q A K A K S - - - - - D K ScCtr9  
476 E L N N I A V L Q H L G L E A H G L K A K S P - - - - - D A SpTpr1
```

```
p . . f p - - - - - f p f f p p Consensus #1  
N L E X N - - - - - V T L X Y N Majority  
610 620 630 640  
437 E L P N - - - - - Y V P Y N TbCtr9  
490 N L E O G V S V L G Y K D T G I F H R L I E S G H S V D V P W N K V T T F N AtCtr9  
524 F K S N - - - - - T S T Y N DdCtr9  
461 S E R - - - - - T T L F N EhCtr9  
492 N A - - - - - V T T S Y N HsCtr9  
511 L H Q I E V K - - - - - H L Y N NgCtr9  
534 D E S N - - - - - T L E Y N ScCtr9  
509 N P E - - - - - L L D Y N SpTpr1
```

```
f f b f . a . f . . f a . f p . f p . p f f b . b f p p f a f p f b - - f p . f Consensus #1  
L A R L L E X M X D T X X A E X L Y X X I L K E H P X Y I D A Y L R - - L X X X Majority  
650 660 670 680  
449 A R L L E T S - D K V R A E L Y S K H H P F S Y Y R - - L E TbCtr9  
530 L A R L L E Q H K T A A F Y R L I L F K Y P Y I D A Y L R - - L A A S AtCtr9  
535 L A R L Y E T M G Q N K A E E L Y K I K E H P Y Y D C Y L R - - L C DdCtr9  
472 K G R L E E M K L E A E K C Y Q E I K E N P W Y D A R L R - - R Y H EhCtr9  
503 L A R L Y E A M C E H E A E K L Y K I L E H P Y D C Y L R - - L A HsCtr9  
526 A R K E V S K S D A K L Y L K I A Q H P Y I N A Y L R - - L K NgCtr9  
545 A R T N E K N - D C K S E S Y S T S L H P A Y I A A R R N L Y L K ScCtr9  
520 L A R C E E E G N T S V A E Y V I L E K H P F I D A R R - - K L SpTpr1
```

```
f b . p p p . p a f . . f f b a f f p f . f p p f a f f f f p . f f f . p . a Consensus #1  
A K X X G N Y X E A X E X X N E A L X X X P D N P E A W X L L G X L L L X Q K E Majority  
690 700 710 720  
486 A K A E R W R K A I M N L R I P D E P R A Y L L E Q R R TbCtr9  
568 A K A N L P L A I E N E A L K D D K N P N A S L L G E L E L K D AtCtr9  
573 C K Q G D Y E A G E E L D Q P D N Q E A W L Y G N L H L Y K E E DdCtr9  
510 W D E K Y L A S Q E V E T I N F P N Q E A K L L G E L C Q Q G K EhCtr9  
541 A D K G N F E A S D I E A L N Q D H P A W S L G N L H L A K Q E HsCtr9  
564 Q Q K G N H E K A I H C L A T E P N A T W L G Q T Y L E Q N N NgCtr9  
584 A Q S K I E D S T E N K L D I N K S D E R S Y G W Y L K N K E ScCtr9  
558 Q L S - P N E E T F K E H H D S O N E R A G W Y L S K Q K R SpTpr1
```

```
f . f f . b . f . . f p p p f - - . . b p a . p f f f p f p - p f p f b p f b p Consensus #1  
W X P A Q K I F X H I T X X X - - - X K X D X Y A L L X L G - N V Y X X A A R Q Majority  
730 740 750 760  
526 Y A A M N I R L K R - - - - - C V L A L G - Y H A Q Q TbCtr9  
608 W V K A K E T F R - A D - - T D G K D S Y A L L G N W N Y A A R AtCtr9  
613 W Y P A Q K N F E Q I T E - - D N K T Y A S L L G - N Y N A K F DdCtr9  
550 D D A F K I F N S T H N - - - N L Y A L A L A - R V M G R Q EhCtr9  
581 W G P G Q K K F E R I L K - - S T Q D T Y S L A L G - N V W Q Q HsCtr9  
604 Y T E A Q K A F E Y I T - - I D K D I Y A L L G - N V Y R NgCtr9  
624 R K N N E K S T T H N K E V K Y N S H D A Y A L L A - N Y T I A R D ScCtr9  
597 R P E D P E R H C R - H W D D I Y S L L G - N A Y A R E SpTpr1
```

```
. b - - - - b a . a b . . b . . b f f . f p p b f f p f a f p p f p f f p p Consensus #1  
- K - - - - X E X X K X X K H L L K A X Q L Y X K V L X K D P X N X Y A A N G Majority  
770 780 790 800  
558 H S - - - - G D S Y F L E L A K D R F H F L K D K N L A A H G TbCtr9  
645 E K - - - - N P K L E A T H L E K A K E L Y K V L Q H N N Y A A N G AtCtr9  
650 - - - - - N P K V E K Y I L N A E Q Y V L K N P N Y A A N G DdCtr9  
585 - - - - - - - P K Q Q L E A K L Y K L D P N L A G EhCtr9  
618 P T - - - - R K E K H Q D A A Y K Q V L R N D K N Y A A N G HsCtr9  
640 A K P N P D E E Q I E K H L D Y A L F E K T L K D N N Y A A L NgCtr9  
663 G K K S R N P E Q G K S K S Y L K A Q L Y K V L D P F N F A A G ScCtr9  
635 F V H N D - E K L K R Q K L Y I K A Q S Y D Q K D P K N H A A G SpTpr1
```

```
f . f f f f a b p p f p . f f . f f p b f b a f f f - - - - . p f a f f f p Consensus #1
I X I X L A E K G X F X X A L X X F S Q V R E A L X - - - - D C X D V W X N Majority
      810          820          830          840
590 A C C L G L E G R H E S C L L D V G E I - - - - N C S Y V R K H TbCtr9
680 S G I L A E K G F D I A K D F Q V Q E A S G S - V F L Q M D V W N AtCtr9
682 I G I L A E K G L A G E T F L Q R E A S - - - - D C P V S N DdCtr9
613 A T T A E K E N S N I F V I E S L Q R V N D V C P Y V V EhCtr9
653 I G I L A H K G F R E A R D F A Q V R E A T - - - - D I S D V W N HsCtr9
680 S G C L C E N G T E E G K A S V R E A C G D - D M K D T Y N NgCtr9
703 A I I A E S K R P A L E R V R S L D - - - - E D V Q N ScCtr9
674 I A I L A Q N R F K A L L S V R E A K - - - - D T T N SpTpr1
```

```
f f b f p f . f b p f p . f f b f p a p p f b b f p p . - a p f . f f . p f f b Consensus #1
L A H C Y X E Q K Q F S X A I K X Y E X C L K K F X N - - E N P E V L X Y L A R Majority
      850          860          870          880
624 Y E A H M N K I S D S K Q A I D L Q D P - - R A P L Q S S L A F TbCtr9
719 L A H Y A Q G F A L T K Y Q C L A K F F N - T D S Q L Y L A R AtCtr9
716 L A H Y S K G L F D N A I K Y E C L K K S P K E I E T M Y L A DdCtr9
653 G T C Y Y M A K S F E L N Q Y - - E E V L N L A Q EhCtr9
687 L A H Y E Q K Q Y I S A Q Y E C L K F K H - Q N T E V L Y L A R HsCtr9
719 L G H A I Q K Q F S Q A E K Y S C S K F F N D - E N P M V L A Y L A R NgCtr9
736 L A H C Y E E Y K A I E N Y E L V L K K F D N E K T R P H L N L L G R ScCtr9
707 G N C L A E K Q F S R A I E F E V Y S S T E S - Y G V L S L G R SpTpr1
```

```
. f f . . p b - - - - - f p a p f . p f b b f f . f . f p p f p - - - - - Consensus #1
X L F D X X R - - - - - Y Q E X X X T L K K A L H L X P S N X S - - - - - Majority
      890          900          910          920
662 C L F C E R - - - - - Y A A A V Q K K A D E L P S E - - - - - TbCtr9
758 T H Y E A E Q - - - - - Q E K K T L L A H L T P S N Y - - - - - AtCtr9
756 V Y F D A R - - - - - K Q T L K K A H Y P H N S - - - - - DdCtr9
690 C E F M L R - - - - - Y K E A E H L E A L K E P V - - - - - EhCtr9
726 A L F K C - - - - - Q E K Q T L L K A R H A P S D T V - - - - - HsCtr9
758 S L F D N A - - - - - H E E S N I L K K Q E Q D N - - - - - NgCtr9
776 A Y A R A I K E T S V N F Y Q K A E K T A L D L F K E S S K S K F I H ScCtr9
746 V Q R R E S K N V D Y K E R T L A L E K N P E N S - - - - - SpTpr1
```

```
- f b f p f f f f f p . f f p . f p . - - . b p f p a f . p f f . p f a f f Consensus #1
- L X F N X A L V Y Q Q X A X X T L X K - - K K R T V X E V X N X X X E L E X A Majority
      930          940          950          960
688 L L F N A L Y A S V A S Q - K Q E Q V E K E R S F L T E G TbCtr9
785 - F D G V Q K S S S T L K - - K K R T D E V R T A E E N A AtCtr9
783 - F N A S E M Q A I F L E K - - H Q E T F N K E L E A DdCtr9
715 - - - Y N Y Q L A C Y L E E - - - Q K O K K K L K E E L E Q R EhCtr9
753 - L M E N A L V Q R A S V L K D - - E K S K E V L N K E L E A HsCtr9
785 - Y N I A L E K V A T L D - - S N D K V Q I E D N Q T NgCtr9
816 S F N I A L H F Q A E T L R R S N P K F R T V Q K D S E L K E G ScCtr9
780 - L L F N A V Q F Q C E L I R K P E N S R T V E N F Q L S SpTpr1
```







|      |                                                                                 |              |
|------|---------------------------------------------------------------------------------|--------------|
|      | p f p a . . a p b p f p a p p a p a . . . p . . p a . . f . . . p a a . a . . . | Consensus #1 |
|      | X V X E E E X N R X I E E S D X N E S X D X E A X D X X E X X - X D E X E X - - | Majority     |
|      | 1290 1300 1310 1320                                                             |              |
| 873  | A V L F S G N F A G V S A E D K S D T A D G N                                   | TbCtr9       |
| 1053 | E L M E E S H P S P K K E E S N E A D P N E E E E E E E A N                     | AtCtr9       |
| 1061 | D E E E T N R E E D D N E K V D E M D A K E A E K K E V E D F F                 | DdCtr9       |
| 903  | E E K K N I E Q S D V V S L                                                     | EhCtr9       |
| 1106 | V S G R S H S E D S R P A S P A E D H E S E R G D N E G S G Q                   | HsCtr9       |
| 1020 | D V P Q S S S A R V I E N E E D E Y E G S R A D E G E E E F                     | NgCtr9       |
| 1037 | L S E F I D S D E E E A M G S E Q K N D D N D E N N D D N G L F                 | ScCtr9       |
| 1002 | N E E E V R I E E K N I T D Q D D N K E N L F E D E E                           | SpTpr1       |
|      | .....                                                                           | Consensus #1 |
|      | -----                                                                           | Majority     |
|      | 1330 1340                                                                       |              |
| 901  |                                                                                 | TbCtr9       |
| 1091 |                                                                                 | AtCtr9       |
| 1101 | G S E N E M                                                                     | DdCtr9       |
| 922  |                                                                                 | EhCtr9       |
| 1146 | G S G N E S E P E G S N N E A S D R G S E H G S D D S D                         | HsCtr9       |
| 1060 | A F D E                                                                         | NgCtr9       |
| 1076 |                                                                                 | ScCtr9       |
| 1039 |                                                                                 | SpTpr1       |

Consensus 'Consensus #1': When 50% (4) match the residue group of the Consensus show the group label of the Consensus, otherwise show '.'. Residue Groupings of Consensus #1 are: a=(DE), b=(HKR), f=(AFILMPVW), p=(CGNQSTY).

Decoration 'Decoration #1': Shade (with black at 50% fill) residues that match the consensus named 'Consensus #1' exactly.

Decoration 'Decoration #2': Shade (with solid black) residues that match the Consensus exactly.
