# Supplementary material for: Depletion of Trypanosome CTR9 Leads to Gene Expression Defects
Source: PubMed Central journal article supplement (PMC3332058; doi:10.1371/journal.pone.0034256), 2012-04-20
Supplement: pone.0034256.s002.pdf [file pone.0034256.s002.pdf]

## **Supplementary Figure S2**

**Alignment of Cdc73 homologues**, made using MegAlign (DNASTar). Details as for Figure S1. Organisms are: Tb- *T. brucei*, Sc- *Saccharomyces cerevisiae*; Sp- *Schizosaccharomyces pombe* NP\_595891.1; Hs- *Homo sapiens* NP\_078805.3; Dd- *Dictyostelium discoideum* XP\_644100.3; Ng- *Naegleria gruberi* XP\_002683436.1; Pf- *Plasmodium falciparum* XP\_001351765.1; Tt- *Tetrahymena thermophila* EAR84002.1; Pi- *Phytophthora infestans* XP\_002903756.1; Eh- *Entamoeba histolytica* XP\_648719.1; Tv- *Trichomonas vaginalis* XP\_001310227.1; Tp- *Thalassosira pseudonana* XP\_002287950.1.



----- Consensus #1  
----- Majority  
-----  
130 140 150 160  
-----  
1 - - - - - TbCdc73  
1 - - - - - ScCdc73  
1 - - - - - SpCdc73  
1 - - - - - HsCdc73  
1 - - - - - DdCdc73  
1 - - - - - NgCdc73  
121 E K N I N L N K Y I N T H N D Y L I N I D L F D K L D D V E M E S D I L F T Q K PfCdc73  
1 - - - - - TtCdc73  
1 - - - - - PiCdc73  
1 - - - - - EhCdc73  
1 - - - - - TvCdc73  
1 - - - - - TpCdc73

----- Consensus #1  
----- Majority  
-----  
170 180 190 200  
-----  
1 - - - - - TbCdc73  
1 - - - - - ScCdc73  
1 - - - - - SpCdc73  
1 - - - - - HsCdc73  
1 - - - - - DdCdc73  
1 - - - - - NgCdc73  
161 N Y N N D I Y D K F N Q D K Q N N D E Y I S N I N D K I I E K K N I N E D T H N PfCdc73  
1 - - - - - TtCdc73  
1 - - - - - PiCdc73  
1 - - - - - EhCdc73  
1 - - - - - TvCdc73  
1 - - - - - TpCdc73

----- Consensus #1  
----- Majority  
-----  
210 220 230 240  
-----  
1 - - - - - TbCdc73  
1 - - - - - ScCdc73  
1 - - - - - SpCdc73  
1 - - - - - HsCdc73  
1 - - - - - DdCdc73  
1 - - - - - NgCdc73  
201 Y T D E N L I S F D Y T K K L F D I N K I N E S F I I H M K N D D I F F C T S L PfCdc73  
1 - - - - - TtCdc73  
1 - - - - - PiCdc73  
1 - - - - - EhCdc73  
1 - - - - - TvCdc73  
1 - - - - - TpCdc73









```
f a f . . f . . . f f . f f p . p p p . p b . . p . . . - - - - . p p . Consensus #1
I D F X L L X K D A V X E L L X S X N X K S X X K X - - - - - S X X Majority
                730                740                750                760
140 - - - - - S A G . . N N L R S I . . G I . . I N - - - - - P F TbCdc73
187 I N F G Y L I K D A E K L S I K S L G S K L P - - - - - P H ScCdc73
168 I D F I S L R K D - V D Y H A K A T A S - - - - - A H SpCdc73
307 K D T G T Y H G T L K V E A S A R K Q T P A - - - - - A Q P V P HsCdc73
312 S F A N L T N Y K K F K E D E E E K K K R S S S S - - - - - S S L DdCdc73
293 T G S M M K S D P V E L S N T S A P P T T N N - - - - - T F S N NgCdc73
720 D F S R H N Y F K E E L L K N I K V F I G I K K N I I V D D Q S K M PfcCdc73
188 I N F K H Y I K Q L D E G K T N P L E I K - - - - - I N TtCdc73
197 D H K T K F E N V K T L E L V N A E E K I E K A S - - - - - K A S A L PiCdc73
57 N D N L L R L K E E E G Y L V D K - - - - - E K EhCdc73
176 I D S V L L N E K D S E H N I V N Y Q Q N R D - - - - - N Q D S TvCdc73
352 Y Q E V V Q A E E K K R A S G S R P A P P G G - - - - - P S S TpCdc73
```

```
. f . p p . . . . p . - - - - . . . . b . f f f f f . p - - - - - Consensus #1
X D X T X K K S K P X - - - - - K X - X T P I I L V P X X - - - - - Majority
                770                780                790                800
161 M P E H S Q R N R - - - - - K L N F V P I L S P - - - - - TbCdc73
218 K G A H R I S K T G S - - - - S G G P R D P I I L P S A - - - - - ScCdc73
192 A D E E R P A K K R - - - - - N - - - - - D P I I L S P - - - - - SpCdc73
342 R V A R P P P - - - - - Q K G S T P I I I P A A - - - - - HsCdc73
347 L S S P V K S S P G S P S I I P H L K N T P I I V P S - - - - - DdCdc73
328 I D E T I K K S V P T S - - - - K Q V K K P L P I I L P P - - - - - NgCdc73
760 D D K K K I K K N K W I D E I H L V Y K R P I I E K Q I I T N S D N PfcCdc73
217 Y C L F K D L R D K G - - - - - L K P I I V P T M - - - - - TtCdc73
232 L T T V R K E Q L P L H R L V K E K I L G T P I I V P A - - - - - PiCdc73
83 T K T K T H D D - - - - - Y Y I P S V - - - - - EhCdc73
211 S S L I D A N Q - - - - - R I F K P I I L V P K - - - - - TvCdc73
387 K S V R A G S G A A A A V G A S V A K I D G N P I I V P N A - - - - - TpCdc73
```

```
- - - - - f p p f f p f f p f b . f f - . a p f f f . p . a b . . f p . Consensus #1
- - - - - R S S L L T X X N I K D F L - X E G K X V P P D E K K X N X D X Majority
                810                820                830                840
185 - - - - - S S L . . N I K D F L - E G Y V E P S S F L N V T TbCdc73
246 - - - - - S S L T . . N I K Q F L - L E K Y V N P R N L P S V G ScCdc73
214 - - - - - S S L L T H N I K K F L - E E G V P P A E A A H A G SpCdc73
368 - - - - - T S L T . . N K D L - Q L K V P D E K K K Q G Q HsCdc73
379 - - - - - A T . . Y N L E F L - Q H R P L E K K Q E A S DdCdc73
356 - - - - - R S S L L T Y N I K D F L - Q R G V S D E K K K N D P NgCdc73
800 K S I I D N T - R K P . . K N N K S F L L H N K T T N D I L Q N D K PfcCdc73
239 - - - - - G R . . N . . K K F L - A E G K Y E D P E N K D S D N E TtCdc73
264 - - - - - S D L T . . N K D F L - E G Y V S M Q K K S E G R PiCdc73
102 - - - - - S A L . . D N I Q Q F - K Q K Y K S L C D T V N - EhCdc73
235 - - - - - S . . L . . N I K Q F L - V E . . S E P D E G G E N - - TvCdc73
419 - - - - - S C T . . N A G F F L G K E A T . . P R D Q A V K R D A TpCdc73
```



Consensus #1  
Majority

850 860 870 880

216 G - - D M N E D P K H V K P G S F L D A D K Y R V Y R E F R V N - - TbCdc73  
277 - - - - - V N I E K E - - - R - - R P I R F I V D N T R M T - - - ScCdc73  
245 G R G P E L I A L S H K S - - - S K - F G T I R F I V V T E K - - - SpCdc73  
399 R E N E T L I Q R R K D P G G T I V T P Y R V V D P L K - - - HsCdc73  
410 - - - Q N I I K P M I D - - - R T Q K T Y E V D N K S - - - DdCdc73  
387 - - - - T T K P K E V I K - - - H - - K T G T Q Y L V D T K N - - - NgCdc73  
839 - - - - - N K Q N F T L I Y K F K S I K F L V V I N H I K K - - - PfcCdc73  
271 - - - - - R I Q I E K K - - - - - G H N L F E V Y D N G T E S K N TtCdc73  
295 - - - - - K Q Q S M I H E - - - E D G H V Y T F K V V D N R - - - PiCdc73  
131 - - - - - V D I T Y G - - - - - - - - - V Y H N K P T N D - - - EhCdc73  
263 - - - H F V I N H H T V T - - - - - - - K I I D F D V V A D P K L - - - TvCdc73  
451 G K R G G T I S I T R K L T - - - R G G D I T F D D N P T T R - - - TpCdc73

Consensus #1  
Majority

890 900 910 920

252 G P K Q K N W N V C A C V D G N E W Q F N - - - R W F D V P - S L C TbCdc73  
304 - - - K P E Y W D R V V A F T G H T W Q F N - - - N Y Q W S - - - - P ScCdc73  
277 - - - K P D Y W D R V V C V F T G Q A W Q F - - - D Y K W S - - - - P SpCdc73  
435 - - - M P Q D W D R V V A V F V G P A W Q F K G - W P W L P D G - - - S P HsCdc73  
440 - - - K P E D W Y R V V A F V G E A W Q F K - - - D W K W S N - - - - P DdCdc73  
415 - - - K N D W R V V A F T I G Q L W Q F K D S N N W F S D - - - - P NgCdc73  
871 - - F T Q N D W K C V A V K E S - - - K Y - - I K Y P Y Q I - - - T PfcCdc73  
300 N P S Q K S K W R V V G V F V G Q K Y Q F K G - - - W P K E D - - - - N TtCdc73  
322 - - - D K D W R S V V G V V G Q S W Q F K G - - - W K W K F - - - - P PiCdc73  
151 - - - I P K - - D R V A V F I D E D W Q F E D - - - P K T - - - - P EhCdc73  
289 - - - K E D W K Y V V A F G F K W E N - - - D D D N R Q H D TvCdc73  
484 - - L Q K E D W N R V V A V G A S W Q F K G - - - W Y S - - - - P TpCdc73

Consensus #1  
Majority

930 940 950 960

288 S R L F R V C G F L F E D K P K A Q E - W H V T L K R R V V K TbCdc73  
332 Q L F R C K G Y Y H F A G D S P Q H V Q - W N V E K E D N - - K ScCdc73  
305 H Q L F H V K G F L V Y V G D P H P A T H D - W N V E G F E R L - - SpCdc73  
467 V F A S K A F H K Y E V R L D P N V Q K - W D V T L E S Y H - - K HsCdc73  
468 A L F A N G F Y V K F D S N L P D V V K - W D V K L H S S - - K DdCdc73  
446 S I F K K G F A Y G A L P Q N T Q N - W N V E K L Y S R L D S K NgCdc73  
903 T T L F P K F L I Y N D D I P H E L Q S N E I K R D - - PfcCdc73  
332 P S D O V K G F Y K Y Y D I P T P D O V A N - W N V K I S R N - - K TtCdc73  
350 L F K V C G H N Q G S Q L N P E K - W D V K L M H P D - - K PiCdc73  
177 E C T K C C F Y V L N H Q Q L P M K W L - R H Q I L H L N - - EhCdc73  
323 S K L F R Y L G Y V F D Q N Y S T V Q N - W K V K I Y Q S A - - Q TvCdc73  
513 V L F S R A F G F Y V L G A A P N E K - W N C K I G K S R D - - TpCdc73
