# Supplementary material for: Depletion of Trypanosome CTR9 Leads to Gene Expression Defects
Source: PubMed Central journal article supplement (PMC3332058; doi:10.1371/journal.pone.0034256), 2012-04-20
Supplement: pone.0034256.s003.pdf [file pone.0034256.s003.pdf]

### **Supplementary Figure S3**

**Alignment of Leo1 homologues**, made using MegAlign (DNASTar). Details as for Figure S1. Organisms are: Tb- *T. brucei*, At- *Arabidopsis thaliana*; Dd- *Dictyostelium discoideum* XP\_637916.1; Tp- *Thalassiosira pseudonana* XP\_002289477.1; Hs- *Homo sapiens* NP\_620147.1; Sc- *Saccharomyces cerevisiae* Leo1; Ng- *Naegleria gruberi* XP\_002677260.1; Tt- *Tetrahymena thermophila* EAR92336.1; Pi- *Phytophthora infestans* XP\_002903832.1



|                                                                                 |              |
|---------------------------------------------------------------------------------|--------------|
| f . a . p a b p . p b . p a - - . p a a a a . a a f a . a a b p - - - - -       | Consensus #1 |
| V X D D X E R S E X X K S D - - X D X D X D E E X E D X X X E X R Q - - - - -   | Majority     |
| 170 180 190 200                                                                 |              |
| 88 V V D P A L L S R S L L R R F F G D T I C E T D V D T S N E E - - - - -      | TbLeo1       |
| 90 E A D P E E S E A D S D - - S D K E H G G R A K K R R Q E V V E S G          | AtLeo1       |
| 83 V N S D E K K D K - - E D D Q E Q Q E D Q D E Y - - - - -                    | DdLeo1       |
| 92 S S S S A S N A N K S N L F G D D S S D G N D I V G R S G                    | TpLeo1       |
| 161 N S D D E E R A Q S D E D K L Q N D D E K M O N T D E R P Q L S D D E       | HsLeo1       |
| 71 D D D D V K S E E K S D - - S D D D E G E N N H R S R H - - - - -            | ScLeo1       |
| 40 V E F H R R V S S - - - - H O K I A E K E R E E Q R K - - - - -              | NgLeo1       |
| 13 - - - - - - - - - - - - - - - - F O V S K E Q T F N K N Q - - - - -          | TtLeo1       |
| 53 E D D N K E R V E K G A L S P K K E K D K E M E D F G S Y D - - - - -        | PiLeo1       |
| - - - . . a a . f f p p - - - - - - - - - - - - - - - - - - - - - - f p a       | Consensus #1 |
| - - - S X E X E X E A S X - - - - - - - - - - - - - - - - - - - - - - E         | Majority     |
| 210 220 230 240                                                                 |              |
| 122 - - - A L R K E V E A R - - - - - - - - - - - - - - - - - - - - - -         | TbLeo1       |
| 128 S E R S G E K H Y E S E D E E - - - - - - - - - - - - - - - - - - - - - -   | AtLeo1       |
| 115 N K K K K K S K K N K - - - - - - - - - - - - - - - - - - - - - -           | DdLeo1       |
| 132 G A N S A V N I A A S - - - - - - - - - - - - - - - - - - - - - -           | TpLeo1       |
| 201 R Q Q L S E E K N S D D E R P V A S D N D D E K Q N S D D E E Q P Q L S D E | HsLeo1       |
| 103 R E S L G L D E A E E - - - - - - - - - - - - - - - - - - - - - -           | ScLeo1       |
| 70 - - - - - L E D Q - - - - - - - - - - - - - - - - - - - - - -                | NgLeo1       |
| 29 - - - - - K G W Y K H - - - - - - - - - - - - - - - - - - - - - -            | TtLeo1       |
| 87 - - - S E E E F K A S - - - - - - - - - - - - - - - - - - - - - -            | PiLeo1       |
| . . . . . a . p p . a . p . p . f p . p a . a p a a . f . - - - - -             | Consensus #1 |
| X X - - - - D X - X D X D F D X X X G X X D K E E X E X I R - - - - -           | Majority     |
| 250 260 270 280                                                                 |              |
| 132 - - - - - - - - - K A V Y E L F G E E A A I I G - - - - - - - - - -         | TbLeo1       |
| 155 E K E E V Q V A D V N I R V G S D D E A E E Y R N D V E Q D E H R           | AtLeo1       |
| 133 E D E T M E D A E N L D F A G G E E E E E P E L I R - - - - - - - - - -     | DdLeo1       |
| 155 N Q T L G L D S D D K G V G S G A E T K E G E E D D D - - - - - - - - - -   | TpLeo1       |
| 241 E K M Q N S D D E R P Q A D E E H R H D D E E E Q H K S E S A R G S D S E   | HsLeo1       |
| 121 R K F Y G E D A F S D D E - T H F K E E V E L R - - - - - - - - - -         | ScLeo1       |
| 78 - - - - - A H D L K D S G D E S K Q - - - - - - - - - - - - - - - -          | NgLeo1       |
| 37 - - - - - - - - - - - - - - - A G F A K E Y E E H I K - - - - - - - - - -    | TtLeo1       |
| 100 S P A R D G G R E L F G D E G D R S A S G G G D N - - - - - - - - - -       | PiLeo1       |
| - - - - - . . f . f . a f . f p p f f f b . - - - - - - - - - - - - - - -       | Consensus #1 |
| - - - - - - - - - X - P S X X E X S X V A P K D - - - - - - - - - - - -         | Majority     |
| 290 300 310 320                                                                 |              |
| 153 - - - - - - - - - T Q E K P F C L S V D K Q N V G - - - - - - - - - -       | TbLeo1       |
| 195 S P I E D E E G S E K D R P D V D D P E E D P - - - - - - - - - - - -       | AtLeo1       |
| 164 - - - - - - - - - D P T T H I E T S V P A Q - - - - - - - - - - - -         | DdLeo1       |
| 187 - - - - - - - - - K P V Y P P R K E L N A T T D G - - - - - - - - - - - -   | TpLeo1       |
| 281 D E V L R M K R K N A I S D S G A D S D E P K D N S G T M D L F G G A D D   | HsLeo1       |
| 151 - - - - - - - - - H I P S K A N E T A S N - - - - - - - - - - - -           | ScLeo1       |
| 100 - - - - - - - - - - - - - - - L K H S E R T K D S - - - - - - - - - -       | NgLeo1       |
| 53 - - - - - - - - - - - - - - - - - - - - - - - - - - - - - - - - - - -        | TtLeo1       |
| 131 - - - - - - - - - G Y S D N M W P K P K A P K T - - - - - - - - - - - -     | PiLeo1       |

----- Consensus #1  
----- Majority  
330 340 350 360  
174 - - - - - TbLeo1  
224 - - - - - Q Y E S E A E H V E A R Y R E R P V G P P L E V E AtLeo1  
181 - - - - - DdLeo1  
207 - - - - - TpLeo1  
321 I S S G S D G E D K P P T P G Q P V D E N G L P Q D Q Q E E E P I P E T R I E V HsLeo1  
167 - - - - - ScLeo1  
114 - - - - - NgLeo1  
53 - - - - - TtLeo1  
148 - - - - - PiLeo1

----- Consensus #1  
----- Majority  
370 380 390 400  
174 - - - - - L Y E E T D P K I P N R Q T L H P R P Y V S S N P TbLeo1  
249 V P F R P P P G D P V K N K S N I G - I D P K P F D K T F V E E T AtLeo1  
181 - - - - - K I K K L N I L G - I Q P K P F D P I T F E D E - DdLeo1  
207 - - - - - N H Q T K I H T K L P N I G - I N T A Y N P E T H N E - TpLeo1  
361 E I P K V N T D L G N D Y K L P N L - P P F D P Q Y E D E F HsLeo1  
167 - - - - - E I F Y A P N L - I D P I P F D P P F E K V N ScLeo1  
114 - - - - - L D F T P I Q - T D E K E F T E E S L K N NgLeo1  
53 - - - - - Y L E N E Y - I K S - Q H S K Q L F G Q - TtLeo1  
148 - - - - - A K Y F S K P N I L R - V P E P Y T K E A R E M PiLeo1

----- Consensus #1  
----- Majority  
410 420 430 440  
206 S A P R S T E R S - - - - - L Y T T Q N V I R W S G - - - R D K F V TbLeo1  
288 - - F M T D P G A K N - - - - R I R L D N N I R H R V S R D G T Y S E AtLeo1  
208 - - A M N E K S - - - - F N V E V I R W R G L D L G P K E DdLeo1  
239 E E Y Y R Y V H M I R - - - W R Y K N K P E D E T E V R D E G P E TpLeo1  
400 D E E M L D E G R T R - - - L L K V E N T I R W R R R D E E G N E K E HsLeo1  
195 - - E R A S N S A S R E D Q L D D R L I D E N T R W R Y S R D K D K E ScLeo1  
143 - - - - - L T I R W K N E G - - E I E NgLeo1  
74 - - - - - S T I R Y R K - - N N E G N - - L E TtLeo1  
177 - - - N P S E T L Y R N Y V R W R Y K R P A T G R V L D D K K L P E PiLeo1

----- Consensus #1  
----- Majority  
450 460 470 480  
236 S N A R I V R W S D G S L R V G S P L R D N A I T M L A S P S A TbLeo1  
322 S N A R I V R W S D G S L L L G N E V L N I E Q D - - - - - AtLeo1  
239 S N R I V T W S D G S H L Y G N E V L E K E Q P - - - - - DdLeo1  
276 S N R I V K W S D G S Y L H V G E V L E D N L D S S V P L D E K A E G A TpLeo1  
436 S N A R I V K W S D G S M S L H G N E V E V K A P - - - - - HsLeo1  
233 S N Q I V Q W S D G Y S L K V G E E C T D L V D - - - - - ScLeo1  
159 S N R V Q Y E D G S Y F V G N E V L N L E A K - - - - - NgLeo1  
89 S N A I E W D D G S Y H L M V G D Q K L K D - - - - - TtLeo1  
214 S N V Q W E D G F S F V G K E L T R Q K L A N S F L F V N - - - PiLeo1

```

    - - - - - f p p a p . b f p f b p p p - f - - - - - Consensus #1
    - - - - - X Q N D X X H L X X S Q X X - - - - - Majority
          490             500             510             520
276 I S K G D L T L P A M V S I N P K H L V E A S I E K A V N E E N Q TbLeo1
350 - - - - - K E D N H L F H E K G - - - - - AtLeo1
267 - - - - - Q N F Y S S Q D - - - - - DdLeo1
316 G G G N - - - - A L A G A I G Y L S Q K A R R P P S K R E L E N A TpLeo1
464 - - - - - Q D H N H L F Q - - - - - HsLeo1
261 - - - - - T N T F L T H D Q E - - - - - ScLeo1
187 - - - - - K - Y T N L H L F E V P - - - - - NgLeo1
117 - - - - - Q A C S L E P - - - - - TtLeo1
251 - - - - - E A D P H D S D D V V - - - G Q E S - - - PiLeo1
  
```

```

    - - - - - f p p p p - - - - - Consensus #1
    - - - - - L E C X G - - X - - Majority
          530             540             550             560
316 R I R S V S A Q H N - - - - L A Y S V P T L P S V D W N N L A A G T P E G E TbLeo1
366 - - - - - L G - - R - - AtLeo1
282 - - - - - E C E G - - K - - DdLeo1
351 N K E G V E G K E K D D I M D D S S D E D A P A Q P A G T V L E C L G - - P - - TpLeo1
478 - - - - - L G Q A V - - HsLeo1
276 - - - - - C E G G E - - ScLeo1
203 - - - - - G H G I - - NgLeo1
131 - - - - - - - - - - - - - - - TtLeo1
272 - - - - - V L E C H A - - R - - PiLeo1
  
```

```

    - f . b b f p f b f p p f p p b . b b p f p f . f f p b p p b p f b - f b p f f Consensus #1
    - I K X X L X F R P X S T X S K X H R K L T X X V X G R X Q K X S K - I K X X X Majority
          570             580             590             600
351 F A S Y R K K M E K N R E P T T E Q L Q M E S E L E K Q TbLeo1
372 - I L R F T P S S N S H R L L T I V E R K K A K - K C AtLeo1
288 - I D S L R P K S K V H Q R L E N V K R V K V S K - I K H DdLeo1
387 - I V S A R P S A S E A H R L T A V R R V K R - I A E H TpLeo1
485 - K T L F R P H S T D S A T H R K T S D R K Q K I R I L H HsLeo1
284 - I K T L M F I P S T S K I H Q K L K A V R R Q S K G G Y ScLeo1
211 - T L S S T K G D I L K L T K G T T K K - - K H NgLeo1
131 - - - - - I N Q Q F D Q I P F D K G T I Q K K K H TtLeo1
279 - K E R P M T A S K S S H R L T S R A H K Q K K E Y H PiLeo1
  
```

```

    p p f a f a b a b . . b . b . . a f f b . p p b b p p p p . b . b . p p - - - Consensus #1
    T X L D P E X E K E K R E K E E X Q A L R X X T R X X K Q X X R X X R X X - - - Majority
          610             620             630             640
391 L S A K E L L E Q Q Q E Q E R Q A A L R S L T R Q Q A H R R F E R T V E TbLeo1
410 T D D P E E K E K R E K A E S Q N L A T L Q A R E I R K P L P AtLeo1
326 T L D P E E K E K R E K E L L D A L R E K K Q K D D Y R P N R R - - - DdLeo1
425 T D D P E E K L A R I K G K D S A R S S G R R S G G - - - TpLeo1
524 A R D P E C Q T E M I K K E E R L R A I R E Q R R M E K - - - HsLeo1
323 V D P E V E K K E L E K Q S Q L R D R R L K - - E K E K E - - - ScLeo1
248 T K R P E T E E T K V M E E A Q S L K K Q K Q Q - - - Y H NgLeo1
158 - - - - - - - - - - - - - - - - - - - - - TtLeo1
318 E L D G E E Q E Q R V K I T D K L R L R K A R G Y E Y D R E - - - PiLeo1
  
```
